# Supplementary material for: Serum lipid alterations identified in chronic hepatitis B, hepatitis B virus-associated cirrhosis and carcinoma patients
Source: PubMed Central journal article supplement (PMC5309878; doi:10.1038/srep42710), 2017-02-15
Supplement: srep42710-s1.pdf [file srep42710-s1.pdf]

## **Serum lipid alterations identified in chronic hepatitis B, hepatitis B**

### **virus-associated cirrhosis and carcinoma patients**

Tao Wu<sup>1,2</sup>, Xiaojiao Zheng<sup>3</sup>, Ming Yang<sup>2</sup>, Aihua Zhao<sup>3</sup>, Meng Li<sup>2</sup>, Tianlu Chen<sup>3</sup>, Jun Panee<sup>4</sup>, Wei Jia<sup>3,5,\*</sup>, Guang Ji<sup>2,6,\*</sup>

<sup>1</sup> Center of Chinese Medical Therapy and Systems Biology, Shanghai University of Traditional Chinese Medicine, Shanghai 201203, China; <sup>2</sup> Institute of Digestive Disease, Longhua Hospital, Shanghai University of Traditional Chinese Medicine, Shanghai 200032, China; <sup>3</sup> Shanghai Key Laboratory of Diabetes Mellitus and Center for Translational Medicine, Shanghai Jiao Tong University Affiliated Sixth People's Hospital, Shanghai 200233, China; <sup>4</sup> Department of Cell and Molecular Biology, John A. Burns School of Medicine, University of Hawaii at Monoa, Honolulu, Hawaii 96813, United States; <sup>5</sup> University of Hawaii Cancer Center, Honolulu, Hawaii 96813, United States; <sup>6</sup> E-institute of Shanghai Municipal Education Committee, Shanghai University of Traditional Chinese Medicine, Shanghai 201203, China.

**Correspondence:** Wei Jia, PhD, University of Hawaii Cancer Center, Honolulu, Hawaii 96813, United States; or Guang Ji, MD, PhD, Institute of Digestive Disease, Longhua Hospital, Shanghai University of Traditional Chinese Medicine, Shanghai 200032, China. E-mail: [wjia@cc.hawaii.edu](mailto:wjia@cc.hawaii.edu) or [jiliver@vip.sina.com](mailto:jiliver@vip.sina.com).

## Contents

| Name                    | Title                                                                                                                                         |
|-------------------------|-----------------------------------------------------------------------------------------------------------------------------------------------|
| Supplementary Figure 1. | Z-score plots and multivariable model of 140 variables from UPLC-TQMS data among CHB, HBV-associated cirrhosis and HBV-associated HCC groups. |
| Supplementary Figure2.  | PCA and PLS-DA models based on results of plasma UPLC-TQMS profile for each two group comparisons.                                            |
| Supplementary Figure3.  | Heatmap of 9 representative metabolites among CHB, HBV-associated cirrhosis and HBV-associated HCC groups.                                    |
| Supplementary Table 1.  | The metabolomics dataset contains 140 metabolites.                                                                                            |
| Supplementary Table 2.  | <i>P</i> values of multiple logistic regression evaluating group differences of 9 metabolites.                                                |
| Supplementary Table 3.  | Correlation between lysoPC a C20:3 and different variables in HBV-associated cirrhosis and HBV-associated HCC.                                |
| Supplementary Table 4.  | Related ratios in CHB, HBV-associated cirrhosis and HBV-associated HCC groups.                                                                |

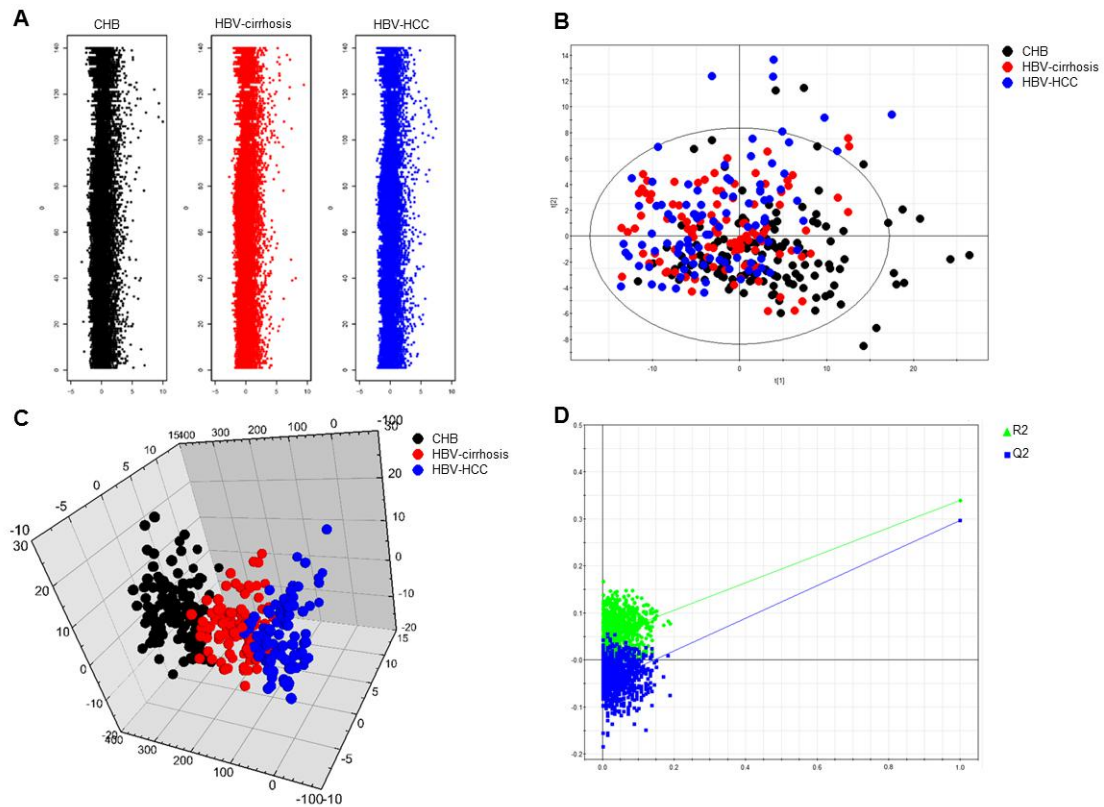

**Supplementary Figure1. Z-score plots and multivariable model of 140 variables from UPLC-TQMS data among CHB, HBV-associated cirrhosis and HBV-associated HCC groups.**

(A) Z-score plots of 140 metabolites in patients with CHB, HBV-associated cirrhosis and HBV-associated HCC. Each point represents one metabolite in one sample, colored by type (black=CHB, red=HBV-associated cirrhosis, blue=HBV-associated HCC). (B) Principal components analysis (PCA) scores plot:  $R^2X = 0.653$   $Q^2 = 0.517$ . (C) Partial least squares discriminate analysis (PLS-DA) scores plot:  $R^2X = 0.425$   $R^2Y = 0.182$   $Q^2 = 0.154$ . (D) Permutation analysis.

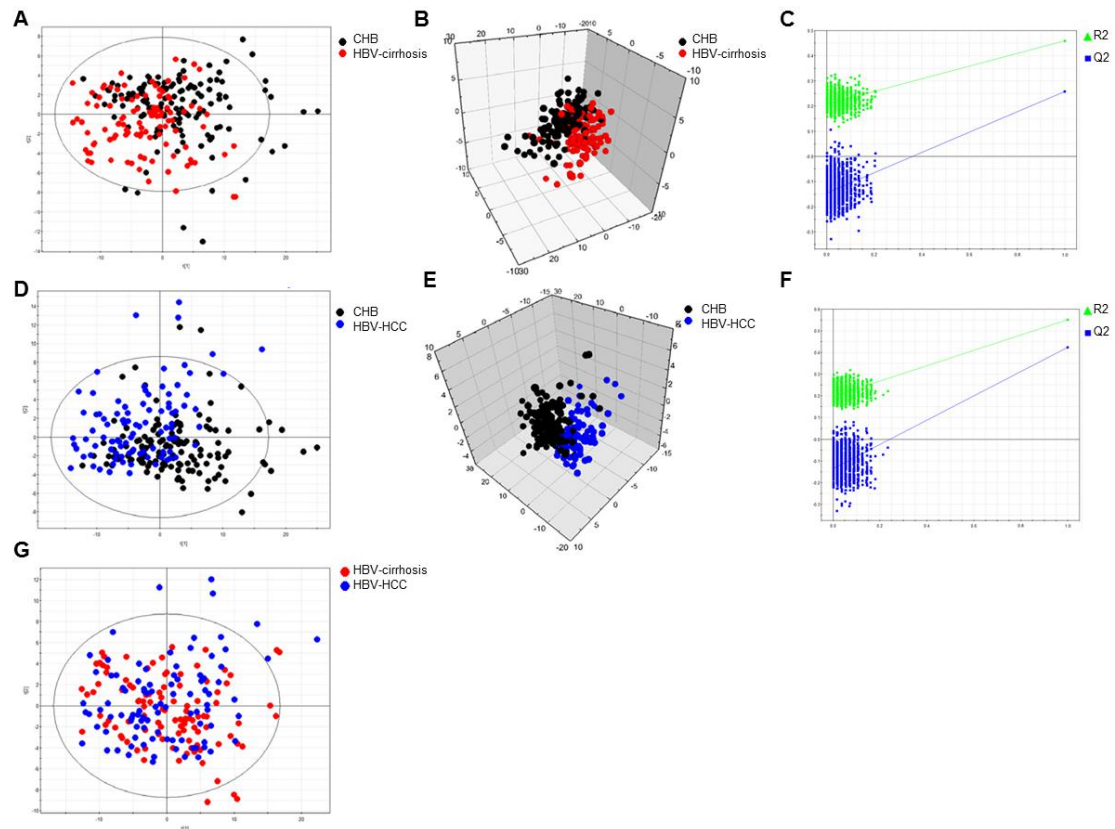

**Supplementary Figure 2. PCA and PLS-DA models based on results of serum UPLC-TQMS profile for each two group comparisons.** 1) CHB versus HBV-associated cirrhosis: (A) PCA scores plot:  $R^2X = 0.637$   $Q^2 = 0.494$ . (B) PLS-DA scores plot:  $R^2X = 0.448$   $R^2Y = 0.460$   $Q^2 = 0.257$ . (C) Permutation analysis. 2) CHB versus HBV-associated HCC: (D) PCA scores plot:  $R^2X = 0.592$   $Q^2 = 0.475$ . (E) PLS-DA scores plot:  $R^2X = 0.459$   $R^2Y = 0.552$   $Q^2 = 0.424$ . (F) Permutation analysis. 3) HBV-associated cirrhosis versus HBV-associated HCC: (G) PCA scores plot:  $R^2X = 0.660$   $Q^2 = 0.493$ . PLS-DA model could not be established successfully.

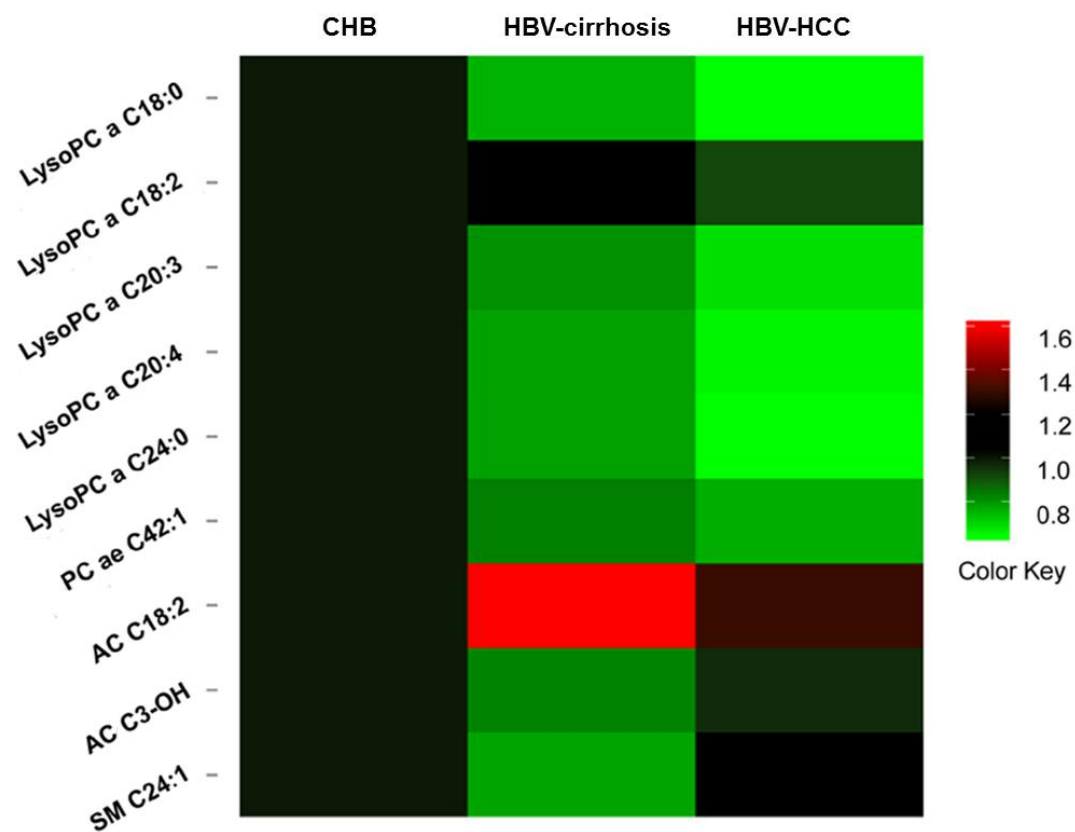

**Supplementary Figure 3. Heat map of 9 representative metabolites among CHB, HBV-associated cirrhosis and HBV-associated HCC groups.** Heat map shows the Fold Change (FC) of 9 metabolites among three groups compared with CHB. Shade of green and red represent fold decrease and fold increase of a metabolite respectively, in HBV-associated cirrhosis and HBV-associated HCC relative to CHB.

**Supplementary Table 1. The metabolomics dataset contains 140 metabolites.**

| <b>No</b> | <b>Name</b>    | <b>Full Name</b>                      | <b>CHB<br/>(N=136)</b> | <b>HBV-associated<br/>cirrhosis(N=104)</b> | <b>HBV-associated<br/>HCC(N=95)</b> |
|-----------|----------------|---------------------------------------|------------------------|--------------------------------------------|-------------------------------------|
| m001      | lysoPC a C14:0 | lysoPhosphatidylcholine acyl<br>C14:0 | 3.08(2.56-3.55)        | 2.58(2.24-2.94)***                         | 2.52(2.14-2.97)***                  |
| m002      | lysoPC a C16:0 | lysoPhosphatidylcholine acyl<br>C16:0 | 99.22(77.52-133.29)    | 76.17(57.96-106.76)**                      | 71.66(49.33-100.02)***              |
| m003      | lysoPC a C16:1 | lysoPhosphatidylcholine acyl<br>C16:1 | 2.31(1.7-2.91)         | 1.88(1.42-2.55)*                           | 1.55(1.18-2.39)***                  |
| m004      | lysoPC a C17:0 | lysoPhosphatidylcholine acyl<br>C17:0 | 1.27(0.92-1.72)        | 0.9(0.59-1.38)***                          | 0.79(0.61-1.15)***                  |
| m005      | lysoPC a C18:0 | lysoPhosphatidylcholine acyl<br>C18:0 | 34.09(24.77-43.48)     | 23.68(18.31-35.05)***                      | 22.82(15.34-30.84)***#              |

| No   | Name           | Full Name                             | CHB<br>(N=136)     | HBV-associated<br>cirrhosis(N=104) | HBV-associated<br>HCC(N=95) |
|------|----------------|---------------------------------------|--------------------|------------------------------------|-----------------------------|
| m006 | lysoPC a C18:1 | lysoPhosphatidylcholine acyl<br>C18:1 | 15.29(11.8-19.88)  | 13.55(10.72-17.31)                 | 11.41(9.45-16.11)***        |
| m007 | lysoPC a C18:2 | lysoPhosphatidylcholine acyl<br>C18:2 | 23.66(18.48-29.08) | 19.73(13.19-25.76)**               | 15.21(10.54-20.96)***##     |
| m008 | lysoPC a C20:3 | lysoPhosphatidylcholine acyl<br>C20:3 | 1.51(1.18-1.94)    | 1.19(0.84-1.57)***                 | 0.97(0.77-1.5)***#          |
| m009 | lysoPC a C20:4 | lysoPhosphatidylcholine acyl<br>C20:4 | 4.61(3.51-6.18)    | 3.52(2.56-4.91)***                 | 3.07(2.36-4.34)***#         |
| m010 | lysoPC a C24:0 | lysoPhosphatidylcholine acyl<br>C24:0 | 0.42(0.26-0.55)    | 0.3(0.19-0.45)**                   | 0.28(0.16-0.42)***#         |

| No   | Name           | Full Name                             | CHB<br>(N=136)  | HBV-associated<br>cirrhosis(N=104) | HBV-associated<br>HCC(N=95) |
|------|----------------|---------------------------------------|-----------------|------------------------------------|-----------------------------|
| m011 | lysoPC a C26:0 | lysoPhosphatidylcholine acyl<br>C26:0 | 0.76(0.48-1.05) | 0.54(0.27-0.8)***                  | 0.54(0.3-0.8)***            |
| m012 | lysoPC a C26:1 | lysoPhosphatidylcholine acyl<br>C26:1 | 0.35(0.23-0.56) | 0.26(0.14-0.42)**                  | 0.29(0.13-0.44)**           |
| m013 | lysoPC a C28:0 | lysoPhosphatidylcholine acyl<br>C28:0 | 0.74(0.46-1.01) | 0.54(0.29-0.78)***                 | 0.47(0.28-0.64)***          |
| m014 | lysoPC a C28:1 | lysoPhosphatidylcholine acyl<br>C28:1 | 0.9(0.54-1.15)  | 0.64(0.34-0.89)***                 | 0.67(0.36-0.84)***          |
| m015 | PC aa C24:0    | Phosphatidylcholine diacyl C24:0      | 0.2(0.13-0.26)  | 0.15(0.1-0.21)***                  | 0.14(0.08-0.19)***          |
| m016 | PC aa C26:0    | Phosphatidylcholine diacyl C26:0      | 1.36(1.09-1.65) | 1.23(0.8-1.49)*                    | 1.23(0.8-1.51)*             |
| m017 | PC aa C28:1    | Phosphatidylcholine diacyl C28:1      | 1.32(1.06-1.63) | 1.1(0.83-1.39)***                  | 1.02(0.81-1.28)***          |



| No   | Name        | Full Name                        | CHB                   | HBV-associated           | HBV-associated           |
|------|-------------|----------------------------------|-----------------------|--------------------------|--------------------------|
|      |             |                                  | (N=136)               | cirrhosis(N=104)         | HCC(N=95)                |
| m018 | PC aa C30:0 | Phosphatidylcholine diacyl C30:0 | 2.58(1.92-3.2)        | 2.29(1.88-3.07)          | 2.29(1.8-3.08)           |
| m019 | PC aa C32:0 | Phosphatidylcholine diacyl C32:0 | 9.34(7.78-12.53)      | 11.23(8.87-14.09)        | 11.38(7.62-16.89)*       |
| m020 | PC aa C32:1 | Phosphatidylcholine diacyl C32:1 | 7(5.35-10.21)         | 7.75(5.43-10.25)         | 7.61(5.18-10.47)         |
| m021 | PC aa C32:3 | Phosphatidylcholine diacyl C32:3 | 0.2(0.16-0.24)        | 0.14(0.11-0.18)***       | 0.13(0.11-0.17)***       |
| m022 | PC aa C34:1 | Phosphatidylcholine diacyl C34:1 | 115.99(94.84-143.03)  | 100.12(84.83-126.26)     | 105.85(82.88-134.74)     |
| m023 | PC aa C34:2 | Phosphatidylcholine diacyl C34:2 | 308.27(251.76-365.27) | 243.2(202.38-318.15)***  | 245.72(186.75-313.15)*   |
| m024 | PC aa C34:3 | Phosphatidylcholine diacyl C34:3 | 8.14(6.2-10.25)       | 6.68(5.19-9)***          | 6.72(4.94-8.2)**         |
| m025 | PC aa C34:4 | Phosphatidylcholine diacyl C34:4 | 0.7(0.49-0.9)         | 0.45(0.33-0.63)***       | 0.42(0.3-0.59)***        |
| m026 | PC aa C36:0 | Phosphatidylcholine diacyl C36:0 | 2.36(1.72-3.1)        | 1.68(1.08-2.17)***       | 1.47(0.98-1.84)***       |
| m027 | PC aa C36:1 | Phosphatidylcholine diacyl C36:1 | 26.16(21.05-34.18)    | 22.89(18.54-26.87)***    | 22.08(16.95-29.12)**     |
| m028 | PC aa C36:2 | Phosphatidylcholine diacyl C36:2 | 191.77(158.73-227.25) | 153.38(119.38-197.96)*** | 149.19(111.67-184.43)*** |

| No   | Name        | Full Name                        | CHB                  | HBV-associated        | HBV-associated         |
|------|-------------|----------------------------------|----------------------|-----------------------|------------------------|
|      |             |                                  | (N=136)              | cirrhosis(N=104)      | HCC(N=95)              |
| m029 | PC aa C36:3 | Phosphatidylcholine diacyl C36:3 | 76.16(61.07-88.22)   | 65.62(52.85-79.45)*** | 61.12(49.04-78.12)**   |
| m030 | PC aa C36:4 | Phosphatidylcholine diacyl C36:4 | 116.11(90.45-142.88) | 83.8(61.16-107.87)*** | 80.08(61.14-108.13)*** |
| m031 | PC aa C36:5 | Phosphatidylcholine diacyl C36:5 | 6.18(4.56-8.94)      | 4.44(2.91-6.26)***    | 4.33(3.02-5.69)***     |
| m032 | PC aa C36:6 | Phosphatidylcholine diacyl C36:6 | 0.34(0.25-0.46)      | 0.21(0.14-0.3)***     | 0.19(0.13-0.28)***     |
| m033 | PC aa C38:0 | Phosphatidylcholine diacyl C38:0 | 2.91(2.38-3.69)      | 2.4(1.79-2.87)***     | 2.25(1.62-2.87)***     |
| m034 | PC aa C38:3 | Phosphatidylcholine diacyl C38:3 | 30.34(23.68-39.06)   | 24.09(17.31-29.61)*** | 23.75(18.18-28.41)***  |
| m035 | PC aa C38:4 | Phosphatidylcholine diacyl C38:4 | 66.91(53.49-83.73)   | 46.83(35.41-61.65)*** | 44.99(33.7-60.33)***   |
| m036 | PC aa C38:5 | Phosphatidylcholine diacyl C38:5 | 25.26(19.72-30.85)   | 18.54(13.4-22.83)***  | 16.74(12.91-22.66)***  |
| m037 | PC aa C38:6 | Phosphatidylcholine diacyl C38:6 | 50.31(37.89-62.51)   | 30.52(19.03-40.34)*** | 29.37(21.05-41.42)***  |
| m038 | PC aa C40:1 | Phosphatidylcholine diacyl C40:1 | 0.5(0.44-0.58)       | 0.43(0.37-0.5)***     | 0.42(0.34-0.49)***     |
| m039 | PC aa C40:2 | Phosphatidylcholine diacyl C40:2 | 0.51(0.45-0.64)      | 0.46(0.38-0.56)*      | 0.46(0.36-0.6)*        |

| No   | Name        | Full Name                        | CHB                | HBV-associated      | HBV-associated      |
|------|-------------|----------------------------------|--------------------|---------------------|---------------------|
|      |             |                                  | (N=136)            | cirrhosis(N=104)    | HCC(N=95)           |
| m040 | PC aa C40:3 | Phosphatidylcholine diacyl C40:3 | 0.53(0.44-0.61)    | 0.48(0.39-0.59)     | 0.46(0.36-0.62)     |
| m041 | PC aa C40:4 | Phosphatidylcholine diacyl C40:4 | 2.78(2.25-3.38)    | 2.27(1.75-2.71)***  | 2.22(1.66-2.62)***  |
| m042 | PC aa C40:5 | Phosphatidylcholine diacyl C40:5 | 7.04(5.54-8.77)    | 5.29(3.97-6.54)***  | 4.81(3.79-6.5)***   |
| m043 | PC aa C40:6 | Phosphatidylcholine diacyl C40:6 | 20.77(16.17-28.12) | 13.68(9.18-17.8)*** | 12.6(9.52-17.77)*** |
| m044 | PC aa C42:0 | Phosphatidylcholine diacyl C42:0 | 0.62(0.48-0.76)    | 0.56(0.46-0.7)      | 0.55(0.44-0.7)      |
| m045 | PC aa C42:1 | Phosphatidylcholine diacyl C42:1 | 0.34(0.26-0.42)    | 0.3(0.22-0.37)**    | 0.27(0.23-0.36)**   |
| m046 | PC aa C42:2 | Phosphatidylcholine diacyl C42:2 | 0.3(0.23-0.35)     | 0.26(0.2-0.31)***   | 0.24(0.19-0.32)***  |
| m047 | PC aa C42:4 | Phosphatidylcholine diacyl C42:4 | 0.24(0.19-0.28)    | 0.24(0.18-0.27)     | 0.22(0.17-0.29)     |
| m048 | PC aa C42:5 | Phosphatidylcholine diacyl C42:5 | 0.35(0.27-0.45)    | 0.29(0.21-0.34)*    | 0.29(0.22-0.41)*    |
| m049 | PC aa C42:6 | Phosphatidylcholine diacyl C42:6 | 0.45(0.37-0.56)    | 0.38(0.3-0.44)***   | 0.37(0.32-0.44)***  |
| m050 | PC ae C30:0 | Phosphatidylcholine acyl-alkyl C | 0.31(0.24-0.38)    | 0.27(0.21-0.36)*    | 0.26(0.2-0.32)**    |

| No   | Name        | Full Name                                 | CHB<br>(N=136)  | HBV-associated<br>cirrhosis(N=104) | HBV-associated<br>HCC(N=95) |
|------|-------------|-------------------------------------------|-----------------|------------------------------------|-----------------------------|
| m051 | PC ae C30:1 | Phosphatidylcholine acyl-alkyl C<br>C30:1 | 0.3(0.22-0.38)  | 0.26(0.19-0.32)*                   | 0.26(0.2-0.34)*             |
| m052 | PC ae C30:2 | Phosphatidylcholine acyl-alkyl C<br>C30:2 | 0.12(0.09-0.16) | 0.09(0.07-0.12)***                 | 0.1(0.06-0.12)***           |
| m053 | PC ae C32:1 | Phosphatidylcholine acyl-alkyl<br>C32:1   | 1.65(1.33-2.13) | 1.65(1.43-2.23)                    | 1.65(1.21-2.25)             |
| m054 | PC ae C32:2 | Phosphatidylcholine acyl-alkyl<br>C32:2   | 0.38(0.3-0.49)  | 0.37(0.28-0.45)                    | 0.33(0.26-0.48)*            |
| m055 | PC ae C34:0 | Phosphatidylcholine acyl-alkyl<br>C34:0   | 0.74(0.6-0.91)  | 0.71(0.58-0.84)                    | 0.68(0.52-0.88)             |
| m056 | PC ae C34:1 | Phosphatidylcholine acyl-alkyl<br>C34:1   | 4.49(3.5-5.68)  | 4.63(4.02-5.67)                    | 4.48(3.4-6.57)              |

| No   | Name        | Full Name                               | CHB<br>(N=136)  | HBV-associated<br>cirrhosis(N=104) | HBV-associated<br>HCC(N=95) |
|------|-------------|-----------------------------------------|-----------------|------------------------------------|-----------------------------|
| m057 | PC ae C34:2 | Phosphatidylcholine acyl-alkyl<br>C34:2 | 6.39(5.35-8.05) | 5.88(5.09-7.34)*                   | 5.62(4.16-7.6)**            |
| m058 | PC ae C34:3 | Phosphatidylcholine acyl-alkyl<br>C34:3 | 4.36(3.52-5.27) | 3.84(2.94-4.92)*                   | 3.4(2.38-4.64)***           |
| m059 | PC ae C36:0 | Phosphatidylcholine acyl-alkyl<br>C36:0 | 0.68(0.5-0.9)   | 0.58(0.46-0.72)**                  | 0.61(0.45-0.84)             |
| m060 | PC ae C36:1 | Phosphatidylcholine acyl-alkyl<br>C36:1 | 5.33(4.2-6.49)  | 4.19(3.22-5.03)***                 | 4.15(3.33-5.2)***           |
| m061 | PC ae C36:2 | Phosphatidylcholine acyl-alkyl<br>C36:2 | 6.85(5.81-8.23) | 5.53(4.71-7.02)***                 | 5.39(4.45-6.89)***          |

| <b>No</b> | <b>Name</b> | <b>Full Name</b>                        | <b>CHB<br/>(N=136)</b> | <b>HBV-associated<br/>cirrhosis(N=104)</b> | <b>HBV-associated<br/>HCC(N=95)</b> |
|-----------|-------------|-----------------------------------------|------------------------|--------------------------------------------|-------------------------------------|
| m062      | PC ae C36:3 | Phosphatidylcholine acyl-alkyl<br>C36:3 | 4.46(3.68-5.54)        | 4.13(3.36-4.82)*                           | 3.83(2.93-5.06)**                   |
| m063      | PC ae C36:4 | Phosphatidylcholine acyl-alkyl<br>C36:4 | 10.8(8.69-13.09)       | 9.23(7.66-11.04)***                        | 8.51(6.62-10.32)***                 |
| m064      | PC ae C36:5 | Phosphatidylcholine acyl-alkyl<br>C36:5 | 7.44(5.83-9.44)        | 6.08(4.55-7.11)***                         | 5.43(4.19-6.8)***                   |
| m065      | PC ae C38:0 | Phosphatidylcholine acyl-alkyl<br>C38:0 | 0.82(0.65-1.05)        | 0.56(0.38-0.73)***                         | 0.51(0.38-0.68)***                  |
| m066      | PC ae C38:1 | Phosphatidylcholine acyl-alkyl<br>C38:1 | 2.93(2.29-3.55)        | 2.29(1.81-2.86)***                         | 2.22(1.75-2.59)***                  |

| No   | Name        | Full Name                               | CHB<br>(N=136)    | HBV-associated<br>cirrhosis(N=104) | HBV-associated<br>HCC(N=95) |
|------|-------------|-----------------------------------------|-------------------|------------------------------------|-----------------------------|
| m067 | PC ae C38:2 | Phosphatidylcholine acyl-alkyl<br>C38:2 | 2.4(2-2.9)        | 2.06(1.57-2.47)***                 | 1.94(1.56-2.44)***          |
| m068 | PC ae C38:3 | Phosphatidylcholine acyl-alkyl<br>C38:3 | 2.85(2.29-3.43)   | 2.37(1.9-2.86)***                  | 2.32(1.91-2.67)***          |
| m069 | PC ae C38:4 | Phosphatidylcholine acyl-alkyl<br>C38:4 | 6.96(5.67-7.95)   | 5.83(4.69-6.83)***                 | 5.43(4.46-6.41)***          |
| m070 | PC ae C38:5 | Phosphatidylcholine acyl-alkyl<br>C38:5 | 11.44(9.25-13.61) | 10.14(8.5-12.25)**                 | 10.51(7.5-12.45)**          |
| m071 | PC ae C38:6 | Phosphatidylcholine acyl-alkyl<br>C38:6 | 4.92(4-6.14)      | 3.9(2.88-4.73)***                  | 3.57(2.77-4.32)***          |

| No   | Name        | Full Name                               | CHB<br>(N=136)  | HBV-associated<br>cirrhosis(N=104) | HBV-associated<br>HCC(N=95) |
|------|-------------|-----------------------------------------|-----------------|------------------------------------|-----------------------------|
| m072 | PC ae C40:1 | Phosphatidylcholine acyl-alkyl<br>C40:0 | 0.94(0.79-1.19) | 0.77(0.56-0.96)***                 | 0.67(0.56-0.85)***          |
| m073 | PC ae C40:2 | Phosphatidylcholine acyl-alkyl<br>C40:2 | 0.96(0.79-1.18) | 0.8(0.64-0.97)***                  | 0.84(0.63-1)***             |
| m074 | PC ae C40:3 | Phosphatidylcholine acyl-alkyl<br>C40:3 | 1.06(0.85-1.29) | 0.94(0.77-1.13)***                 | 0.89(0.74-1.12)***          |
| m075 | PC ae C40:4 | Phosphatidylcholine acyl-alkyl<br>C40:4 | 1.69(1.35-1.98) | 1.42(1.19-1.73)***                 | 1.35(1.18-1.58)***          |
| m076 | PC ae C40:5 | Phosphatidylcholine acyl-alkyl<br>C40:5 | 2.54(2.05-3)    | 2.15(1.79-2.55)***                 | 2.05(1.65-2.48)***          |



| No   | Name        | Full Name                               | CHB<br>(N=136)  | HBV-associated<br>cirrhosis(N=104) | HBV-associated<br>HCC(N=95) |
|------|-------------|-----------------------------------------|-----------------|------------------------------------|-----------------------------|
| m077 | PC ae C40:6 | Phosphatidylcholine acyl-alkyl<br>C40:6 | 3.13(2.55-3.82) | 2.54(1.91-2.95)***                 | 2.3(1.86-2.87)***           |
| m078 | PC ae C42:0 | Phosphatidylcholine acyl-alkyl<br>C42:0 | 0.77(0.69-0.86) | 0.7(0.61-0.76)***                  | 0.67(0.61-0.76)***          |
| m079 | PC ae C42:1 | Phosphatidylcholine acyl-alkyl<br>C42:1 | 0.34(0.28-0.4)  | 0.29(0.21-0.37)***                 | 0.26(0.2-0.32)***#          |
| m080 | PC ae C42:2 | Phosphatidylcholine acyl-alkyl<br>C42:2 | 0.36(0.31-0.44) | 0.31(0.24-0.36)***                 | 0.29(0.24-0.37)***          |
| m081 | PC ae C42:3 | Phosphatidylcholine acyl-alkyl<br>C42:3 | 0.55(0.46-0.67) | 0.48(0.41-0.6)**                   | 0.48(0.39-0.6)**            |

| No   | Name        | Full Name                               | CHB<br>(N=136)  | HBV-associated<br>cirrhosis(N=104) | HBV-associated<br>HCC(N=95) |
|------|-------------|-----------------------------------------|-----------------|------------------------------------|-----------------------------|
| m082 | PC ae C42:4 | Phosphatidylcholine acyl-alkyl<br>C42:4 | 0.73(0.56-0.84) | 0.67(0.52-0.82)                    | 0.65(0.53-0.82)             |
| m083 | PC ae C42:5 | Phosphatidylcholine acyl-alkyl<br>C42:5 | 1.56(1.28-1.83) | 1.4(1.19-1.63)                     | 1.42(1.15-1.8)              |
| m084 | PC ae C44:3 | Phosphatidylcholine acyl-alkyl<br>C44:3 | 0.11(0.1-0.14)  | 0.1(0.08-0.13)**                   | 0.1(0.08-0.12)***           |
| m085 | PC ae C44:4 | Phosphatidylcholine acyl-alkyl<br>C44:4 | 0.28(0.23-0.34) | 0.26(0.22-0.33)                    | 0.25(0.2-0.32)              |
| m086 | PC ae C44:5 | Phosphatidylcholine acyl-alkyl<br>C44:5 | 1.17(0.91-1.56) | 1.19(0.97-1.46)                    | 1.2(0.94-1.64)              |

| No   | Name        | Full Name                               | CHB                | HBV-associated     | HBV-associated     |
|------|-------------|-----------------------------------------|--------------------|--------------------|--------------------|
|      |             |                                         | (N=136)            | cirrhosis(N=104)   | HCC(N=95)          |
| m087 | PC ae C44:6 | Phosphatidylcholine acyl-alkyl<br>C44:6 | 1.52(1.15-1.81)    | 1.44(1.15-1.84)    | 1.46(1.08-1.84)    |
| m088 | AC C0       | Carnitine                               | 35.02(29.12-42.58) | 33.91(27-42.68)    | 33.48(27.01-46.25) |
| m089 | AC C10      | Decanoylcarnitine                       | 0.28(0.21-0.4)     | 0.21(0.17-0.29)**  | 0.21(0.17-0.28)*** |
| m090 | AC C10:1    | Decenoylcarnitine                       | 0.46(0.34-0.57)    | 0.36(0.29-0.52)*   | 0.35(0.28-0.46)*** |
| m091 | AC C10:2    | Decadienylcarnitine                     | 0.06(0.05-0.09)    | 0.06(0.04-0.07)*   | 0.05(0.04-0.07)*** |
| m092 | AC C12      | Dodecanoylcarnitine                     | 0.09(0.07-0.11)    | 0.07(0.05-0.1)     | 0.07(0.06-0.1)     |
| m093 | AC C12:1    | Dodecenoylcarnitine                     | 0.01(0-0.02)       | 0.01(0-0.03)       | 0.02(0-0.02)       |
| m094 | AC C12-DC   | Dodecanedioylcarnitine                  | 0.2(0.13-0.26)     | 0.18(0.12-0.23)    | 0.17(0.12-0.22)*   |
| m095 | AC C14      | Tetradecanoylcarnitine                  | 0.06(0.04-0.09)    | 0.06(0.04-0.09)    | 0.06(0.04-0.09)    |
| m096 | AC C14:1    | Tetradecenoylcarnitine                  | 0.24(0.18-0.29)    | 0.19(0.15-0.23)*** | 0.19(0.15-0.24)*** |

| No   | Name        | Full Name                       | CHB             | HBV-associated   | HBV-associated  |
|------|-------------|---------------------------------|-----------------|------------------|-----------------|
|      |             |                                 | (N=136)         | cirrhosis(N=104) | HCC(N=95)       |
| m097 | AC C14:1-OH | Hydroxytetradecenoylcarnitine   | 0.01(0-0.02)    | 0(0-0.02)        | 0.01(0-0.03)    |
| m098 | AC C14:2    | Tetradecadienylcarnitine        | 0.06(0.02-0.09) | 0.04(0.01-0.09)  | 0.05(0.02-0.08) |
| m099 | AC C14:2-OH | Hydroxytetradecadienylcarnitine | 0(0-0.01)       | 0(0-0.01)        | 0(0-0.01)       |
| m100 | AC C16      | Hexadecanoylcarnitine           | 0.09(0.06-0.13) | 0.1(0.06-0.14)   | 0.1(0.07-0.14)  |
| m100 | AC C16      | Hexadecanoylcarnitine           | 0.09(0.06-0.13) | 0.1(0.06-0.14)   | 0.1(0.07-0.14)  |
| m101 | AC C16:1    | Hexadecenoylcarnitine           | 0(0-0)          | 0(0-0)           | 0(0-0)          |
| m102 | AC C16:1-OH | Hydroxyhexadecenoylcarnitine    | 0.01(0-0.03)    | 0.02(0-0.04)     | 0.02(0-0.04)    |
| m103 | AC C16:2    | Hexadecadienylcarnitine         | 0.01(0-0.02)    | 0.01(0-0.02)     | 0.01(0-0.02)    |
| m104 | AC C16:2-OH | Hydroxyhexadecadienylcarnitine  | 0(0-0.01)       | 0(0-0.01)        | 0(0-0.01)       |
| m105 | AC C16-OH   | Hydroxyhexadecanoylcarnitine    | 0(0-0.01)       | 0(0-0.01)        | 0(0-0.01)       |
| m106 | AC C18      | Octadecanoylcarnitine           | 0.01(0-0.04)    | 0.01(0-0.04)     | 0.02(0-0.04)    |

| No   | Name               | Full Name                    | CHB             | HBV-associated     | HBV-associated     |
|------|--------------------|------------------------------|-----------------|--------------------|--------------------|
|      |                    |                              | (N=136)         | cirrhosis(N=104)   | HCC(N=95)          |
| m107 | AC C18:1           | Octadecenoylcarnitine        | 0.12(0.07-0.17) | 0.16(0.11-0.21)**  | 0.14(0.09-0.19)    |
| m108 | AC C18:1-OH        | Hydroxyoctadecenoylcarnitine | 0(0-0.01)       | 0(0-0)             | 0(0-0)             |
| m109 | AC C18:2           | Octadecadienylcarnitine      | 0.09(0.05-0.13) | 0.14(0.08-0.19)*** | 0.11(0.07-0.16)**# |
| m110 | AC C2              | Acetylcarnitine              | 5.84(3.88-7.72) | 5.49(3.99-7.56)    | 6.63(4.2-9.36)     |
| m111 | AC C3              | Propionylcarnitine           | 0.26(0.19-0.39) | 0.26(0.21-0.35)    | 0.28(0.2-0.39)     |
| m112 | AC C3:1            | Propenoylcarnitine           | 0.03(0.02-0.04) | 0.03(0.02-0.05)    | 0.04(0.02-0.05)    |
| m113 | AC C3-DC / C4-OH   | Hydroxypropionylcarnitine    | 0(0-0.01)       | 0(0-0.01)          | 0(0-0.01)          |
| m114 | AC C3-DC-M / C5-OH | Hydroxylcarnitine            | 0(0-0)          | 0(0-0)             | 0(0-0)             |
| m115 | AC C3-OH           | Hydroxypropionylcarnitine    | 0.18(0.14-0.22) | 0.14(0.12-0.19)**  | 0.17(0.12-0.22)#   |
| m116 | AC C4              | Butyrylcarnitine             | 0.01(0-0.02)    | 0.01(0-0.01)       | 0.01(0-0.01)       |

| No   | Name            | Full Name               | CHB<br>(N=136)  | HBV-associated<br>cirrhosis(N=104) | HBV-associated<br>HCC(N=95) |
|------|-----------------|-------------------------|-----------------|------------------------------------|-----------------------------|
| m117 | AC C4:1         | Butenylcarnitine        | 0.08(0.06-0.1)  | 0.07(0.05-0.09)                    | 0.07(0.05-0.1)              |
| m118 | AC C5           | Valerylcarnitine        | 0.09(0.06-0.13) | 0.09(0.06-0.15)                    | 0.08(0.06-0.12)             |
| m119 | AC C5:1         | Tiglylcarnitine         | 0.02(0.01-0.02) | 0.02(0.01-0.02)                    | 0.01(0.01-0.02)             |
| m120 | AC C5:1-DC      | Glutaconylcarnitine     | 0.02(0.01-0.03) | 0.02(0.01-0.03)                    | 0.02(0.01-0.03)             |
| m121 | AC C5-DC/ C6-OH | Glutarylcarinitine      | 0.01(0-0.02)    | 0.01(0-0.02)                       | 0.01(0-0.02)                |
| m122 | AC C5-M-DC      | Methylglutarylcarnitine | 0.01(0-0.23)    | 0.01(0-0.02)                       | 0.01(0-0.02)*               |
| m123 | AC C6 / C4:1-DC | Hexanoylcarnitine       | 0.02(0.01-0.02) | 0.02(0.01-0.02)                    | 0.02(0.01-0.02)             |
| m124 | AC C6:1         | Hexenoylcarnitine       | 0.02(0.01-0.02) | 0.02(0.01-0.02)                    | 0.02(0.01-0.02)             |
| m125 | AC C7-DC        | Pimelylcarnitine        | 0.02(0.01-0.03) | 0.02(0.01-0.03)                    | 0.02(0.01-0.03)             |
| m126 | AC C8           | Octanoylcarnitine       | 0.23(0.17-0.32) | 0.18(0.15-0.25)**                  | 0.19(0.15-0.24)***          |
| m127 | AC C9           | Nonaylcarnitine         | 0.03(0.01-0.04) | 0.02(0-0.03)*                      | 0.02(0.01-0.03)**           |

| No   | Name          | Full Name                  | CHB                 | HBV-associated        | HBV-associated        |
|------|---------------|----------------------------|---------------------|-----------------------|-----------------------|
|      |               |                            | (N=136)             | cirrhosis(N=104)      | HCC(N=95)             |
| m128 | SM (OH) C14:1 | Hydroxysphingomyelin C14:1 | 3.22(2.63-3.96)     | 2.71(2.04-3.29)***    | 2.66(2-3.22)***       |
| m129 | SM (OH) C16:1 | Hydroxysphingomyelin C16:1 | 1.86(1.5-2.27)      | 1.34(1.02-1.72)***    | 1.37(1.03-1.64)***    |
| m130 | SM (OH) C22:1 | Hydroxysphingomyelin C22:1 | 7.88(5.7-11.04)     | 5.73(3.31-7.92)***    | 4.71(2.95-6.97)***    |
| m131 | SM (OH) C22:2 | Hydroxysphingomyelin C22:2 | 9.6(7.29-13.23)     | 7.34(4.39-9.99)***    | 6.77(4.89-9.12)***    |
| m132 | SM (OH) C24:1 | Hydroxysphingomyelin C24:1 | 0.01(0-0.11)        | 0.03(0-0.12)          | 0.05(0-0.15)          |
| m133 | SM C16:0      | Sphingomyelin C16:0        | 89.66(77.98-104.94) | 78.52(65.64-93.71)*** | 73.57(62.72-94.94)*** |
| m134 | SM C16:1      | Sphingomyelin C16:1        | 11.88(9.69-13.91)   | 8.63(7.1-11.73)***    | 9(6.78-11.07)***      |
| m135 | SM C18:0      | Sphingomyelin C18:0        | 18.03(14.45-20.38)  | 12.12(8.42-14.48)***  | 11.28(9.13-14.04)***  |
| m136 | SM C18:1      | Sphingomyelin C18:1        | 7.61(6.17-8.96)     | 4.63(3.17-5.98)***    | 4.54(3.24-5.76)***    |
| m137 | SM C20:2      | Sphingomyelin C20:2        | 0(0-0.13)           | 0.01(0-0.09)          | 0.03(0-0.11)          |
| m138 | SM C24:0      | Sphingomyelin C24:0        | 19.79(16.69-25.42)  | 15.25(11.98-18.92)*** | 15.29(11.65-19.02)*** |

| No   | Name     | Full Name           | CHB<br>(N=136)           | HBV-associated<br>cirrhosis(N=104) | HBV-associated<br>HCC(N=95) |
|------|----------|---------------------|--------------------------|------------------------------------|-----------------------------|
| m139 | SM C24:1 | Sphingomyelin C24:1 | 28.45(18.79-39.37)       | 21.58(13.02-33.09)**               | 28.02(16.94-48.2)##         |
| m140 | Hexose   | Hexose              | 3572.73(2599.63-4207.81) | 3277.44(2526.16-4083.57)           | 3275.3(2416.97-4042.14)     |

Values are expressed as medians (25th, 75th centiles) ( $\mu\text{mol/L}$ ). *P* values were calculated from non-parametric Kruskal-Wallis test for continuous variables, Fisher's exact test for categorical variables for multiple comparisons correction and adjusted by the false discovery rate (FDR) method. \*,  $p < 0.05$ ; \*\*,  $p < 0.01$ ; \*\*\*,  $p < 0.001$  when compared to CHB. #,  $p < 0.05$ ; ##,  $p < 0.01$ ; ###,  $p < 0.001$  when compared to HBV-associated cirrhosis. Glycerophospholipids are differentiated with respect to the presence of ester (a) and ether (e) bonds in the glycerol moiety, where two letters (aa = diacyl, ae = acyl-alkyl) denote that two glycerol positions are bound to a fatty acid residue, while a single letter (a = acyl) indicates the presence of a single fatty acid residue. Lipid side chain composition is abbreviated as C<sub>x</sub>:<sub>y</sub>, where x denotes the number of carbons in the side chain and y the number of double bonds.



**Supplementary Table 2. *P* values of multiple logistic regression evaluating group differences of 9 metabolites.**

| <b>Metabolites</b>          | <b>CHB vs<br/>HBV-associated<br/>cirrhosis</b> | <b>CHB vs<br/>HBV-associated<br/>HCC</b> | <b>HBV-associated<br/>cirrhosis vs<br/>HBV-associated<br/>HCC</b> |
|-----------------------------|------------------------------------------------|------------------------------------------|-------------------------------------------------------------------|
| lysoPC a C18:0              | 0.000                                          | 0.000                                    | 0.059                                                             |
| lysoPC a C18:2 <sup>Δ</sup> | 0.007                                          | 0.000                                    | 0.006                                                             |
| lysoPC a C20:3 <sup>Δ</sup> | 0.002                                          | 0.000                                    | 0.022                                                             |
| lysoPC a C20:4 <sup>Δ</sup> | 0.004                                          | 0.000                                    | 0.013                                                             |
| lysoPC a C24:0              | 0.007                                          | 0.000                                    | 0.075                                                             |
| PC ae C42:1                 | 0.000                                          | 0.000                                    | 0.060                                                             |
| AC C18:2 <sup>Δ</sup>       | 0.000                                          | 0.049                                    | 0.017                                                             |
| AC C3-OH                    | 0.000                                          | 0.059                                    | 0.097                                                             |
| SM C24:1                    | 0.008                                          | 0.637                                    | 0.008                                                             |

Multiple logistic regression was performed to assess the influence of age, gender and BMI on the performance of representative lipids. <sup>Δ</sup> The metabolites are still independent variables for disease classification adjusted for age, gender and BMI (body mass index) based on multiple logistic regression.

**Supplementary Table 3. Correlation between lysoPC a C20:3 and different variables in HBV-associated cirrhosis and HBV-associated HCC.**

| <b>Variables</b> | <b>Corr <sup>a</sup></b> | <b>Corr <sup>b</sup></b> |
|------------------|--------------------------|--------------------------|
| ALT              | -0.017                   | -0.099                   |
| AST              | -0.113                   | -0.303**                 |
| TBIL             | -0.331***                | -0.334***                |
| DBIL             | -0.318**                 | -0.354***                |
| ALP              | -0.103                   | -0.291**                 |
| GGT              | 0.13                     | -0.197                   |
| TP               | 0.19                     | 0.291**                  |
| ALB              | 0.283**                  | 0.399***                 |
| LDH              | -0.324***                | -0.262*                  |
| TBA              | -0.191                   | -0.161                   |
| CHE              | 0.258**                  | 0.335***                 |
| TC               | 0.228*                   | 0.182                    |
| TG               | 0.032                    | 0.124                    |
| CREA             | 0.22*                    | -0.005                   |
| GLU              | 0.126                    | 0.045                    |
| PT               | -0.194*                  | -0.297**                 |
| INR              | -0.209*                  | -0.236*                  |
| AFP              | -0.104                   | -0.16                    |
| CEA              | -0.112                   | -0.003                   |

| <b>Variables</b>  | <b>Corr<sup>a</sup></b> | <b>Corr<sup>b</sup></b> |
|-------------------|-------------------------|-------------------------|
| Viral load        | 0.022                   | -0.046                  |
| RBC               | 0.22*                   | 0.468***                |
| HGB               | 0.234*                  | 0.44***                 |
| PLT               | -0.065                  | 0.064                   |
| Child Pugh Scores | -0.21*                  | -0.373***               |

Correlation coefficient (Corr) was obtained from Spearman correlation analysis between lysoPC a C20:3 and different variables. <sup>a</sup> means in HBV-associated cirrhosis and <sup>b</sup> means in HBV-associated HCC respectively. \*,  $p < 0.05$ ; \*\*,  $p < 0.01$ ; \*\*\*,  $p < 0.001$  represents  $P$  values calculating from Spearman correlation analysis.

**Supplementary Table 4. Related ratios in CHB, HBV-associated cirrhosis and HBV-associated HCC groups.**

| Ratio                      | Enzymes                          | CHB<br>(N=136)     | HBV-associated<br>cirrhosis (N=104) | HBV-associated<br>HCC (N=95) |
|----------------------------|----------------------------------|--------------------|-------------------------------------|------------------------------|
| (AC C16+ AC C18)/carnitine | Carnitine palmitoyltransferase 1 | 0.003(0.002-0.004) | 0.003(0.002-0.005)                  | 0.004(0.003-0.004)           |
| (AC C16+ AC C18:1)/ AC C2  | Carnitine palmitoyltransferase 2 | 0.037(0.025-0.049) | 0.043(0.031-0.056)*                 | 0.036(0.025-0.050)#          |
| AC C16/AC C8               | long chain AcylCoA dehydrogenase | 0.406(0.211-0.524) | 0.516(0.291-0.700)**                | 0.529(0.333-0.712)***        |
| AC C2/Carnitine            | β-oxidation of even-numbered FAs | 0.159(0.129-0.218) | 0.158(0.124-0.228)                  | 0.184(0.130-0.254)           |

Values are expressed as medians (25th, 75th centiles). *P* values were calculated from non-parametric Kruskal-Wallis test. \*, *p*<0.05; \*\*, *p*<0.01;

\*\*\*, *p*<0.001 when compared to CHB. #, *p*<0.05; ##, *p*<0.01; ###, *p*<0.001 when compared to HBV-associated cirrhosis.
